# Supplementary material for: A ratiometric fluorescent probe for fast and sensitive detection of peroxynitrite: a boronate ester as the receptor to initiate a cascade reaction
Source: Royal Society of Chemistry journal article supplement (doi:10.1039/c4ra10048d), 2014-01-01
Supplement: c4ra10048d1.pdf [file c4ra10048d1.pdf]

Supporting information

# **A ratiometric fluorescent probe for fast and sensitive detection of peroxynitrite: boronate ester as the receptor to initiate cascade reaction**

**Ji Zhou, Yang Li, Jiaoning Shen, Qiang Li, Rui Wang, Yufang Xu\*, Xuhong Qian\***

Shanghai Key Laboratory of Chemical Biology, State Key Laboratory of Bioreactor Engineering, School  
of Pharmacy, East China University of Science and Technology, Shanghai, 200237, China.

Fax: +86 21 6425 2603; Tel: +86 21 6425 3589; E-mail: [xhqian@ecust.edu.cn](mailto:xhqian@ecust.edu.cn), [yfxu@ecust.edu.cn](mailto:yfxu@ecust.edu.cn).

## **Table of Contents:**

|                                                                                                                                  |    |
|----------------------------------------------------------------------------------------------------------------------------------|----|
| <b>1. Instruments</b> .....                                                                                                      | 2  |
| <b>2. Synthesis</b> .....                                                                                                        | 2  |
| <b>3. Methods and data</b> .....                                                                                                 | 3  |
| 3.1 The pH titration.....                                                                                                        | 4  |
| 3.2 The detection limit.....                                                                                                     | 4  |
| 3.3 The kinetic curves of the probe P2 and ONOO <sup>-</sup> .....                                                               | 5  |
| 3.4 The reaction between the probe and H <sub>2</sub> O <sub>2</sub> .....                                                       | 6  |
| 3.5 HPLC condition.....                                                                                                          | 6  |
| 3.6 Cell Culture and Imaging.....                                                                                                | 6  |
| 3.7 The toxicity of the probe <b>P2</b> .....                                                                                    | 7  |
| 3.8 The second-order rate constants for the reaction of the probe with ONOO <sup>-</sup> and H <sub>2</sub> O <sub>2</sub> ..... | 7  |
| <b>4. NMR spectra</b> .....                                                                                                      | 11 |
| <b>5. HRMS data</b> .....                                                                                                        | 13 |
| <b>6. References</b> .....                                                                                                       | 14 |

## 1. Instruments

**Instruments:** Fluorescence spectra were collected by a Varian Cary Eclipse Fluorescence Spectrometer. Absorption spectra were recorded by a Varian Cary 100 UV-Vis spectrophotometer.  $^1\text{H-NMR}$  and  $^{13}\text{C-NMR}$  spectra were taken in  $\text{CDCl}_3$  and  $\text{DMSO-}d_6$  at  $25^\circ\text{C}$  on a Bruker AV-400 spectrometer in NMR Facility of East China University of Science and Technology (ECUST). The chemical shifts were reported in ppm (TMS as internal standard). Mass spectra were performed in the Analysis Center of East China University of Science and Technology (ECUST).

## 2. Synthesis

### Synthesis of compounds 2-P2.

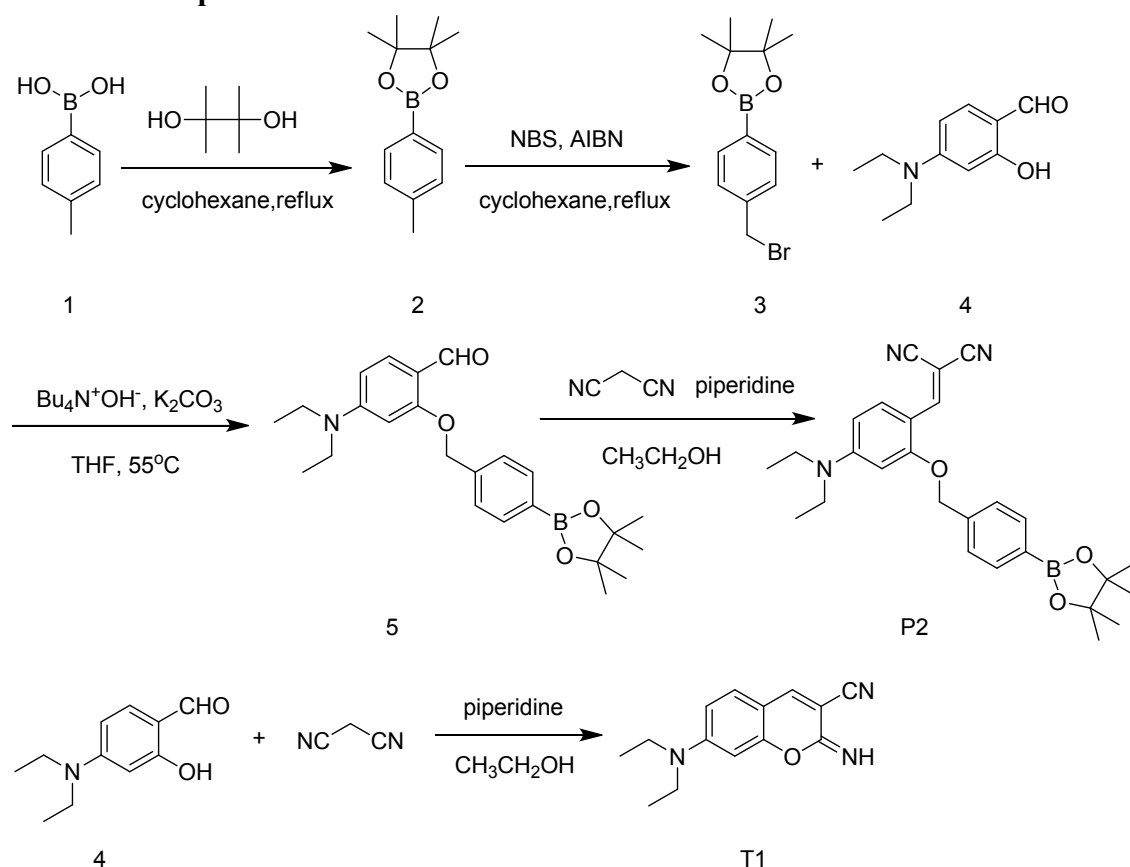

Scheme S1 The synthesis of the probe P2

**Compound 2.** To a solution of p-tolylboronic acid (2 g, 14.7 mmol) in cyclohexane (40 mL) was added pinacol (6.26 g, 52.9 mmol). Then the reaction mixture was refluxed for 10 h. The reaction mixture was concentrated in vacuo to get the crude product 2. The residue was purified by silica gel flash chromatography with 20:1 PE /  $\text{CH}_2\text{Cl}_2$  to give the title compound 2 (2.56 g, 80%).  $^1\text{H NMR}$  (400 MHz,  $\text{CDCl}_3$ ):  $\delta$  7.75 (d,  $J = 7.2$  Hz, 2H), 7.23 (d,  $J = 7.2$  Hz, 2H), 2.41 (s, 3H), 1.38 (s, 12H).

**Compound 3<sup>1</sup>.** Compound 2 (2 g, 9.17 mmol), NBS (2.14 g, 12 mmol), AIBN (0.083 g) were dissolved in 40 mL cyclohexane and the mixture was refluxed under Ar for 7 h. It was then filtered under reduced pressure, and the filtrate was concentrated. The residue was purified by silica gel flash chromatography with 5:1 PE / CH<sub>2</sub>Cl<sub>2</sub> to give the title compound 3 (2.34 g, 86%).

**Compound 5<sup>2</sup>.** Compound 3 (1.54 g, 5.18 mmol), compound 4 (1 g, 5.18 mmol), nBu<sub>4</sub>N<sup>+</sup>OH<sup>-</sup> (2.68 g, 1.04 mmol) and K<sub>2</sub>CO<sub>3</sub> (2.86 g, 21 mmol) were dissolved in 20 mL THF and the mixture was stirred at 55 °C for 24 h. After the reaction was completed, the mixture was concentrated in vacuo, then 60 mL water and CH<sub>2</sub>Cl<sub>2</sub> were added. The organic layer was washed with brine, dried over anhydrous Na<sub>2</sub>SO<sub>4</sub>, and concentrated in vacuo. The residue was purified by silica gel flash chromatography with 1:1 PE / CH<sub>2</sub>Cl<sub>2</sub> to give the title compound 5 (0.85 g, 40%). <sup>1</sup>H NMR (400 MHz, CDCl<sub>3</sub>): δ 10.28 (s, 1H), 7.85 (d, *J* = 7.6 Hz, 2H), 7.76 (d, *J* = 8.8 Hz, 1H), 7.47 (d, *J* = 7.6 Hz, 2H), 7.40 (d, *J* = 7.6 Hz, 1H), 6.34 (d, *J* = 8.8 Hz, 1H), 5.22 (s, 2H), 3.39 (q, *J* = 6.8 Hz, 4H), 1.37 (s, 12H), 1.18 (t, *J* = 6.8 Hz, 6H). <sup>13</sup>C NMR (100 MHz, CDCl<sub>3</sub>): δ 186.9, 163.2, 153.8, 139.8, 135.1, 130.4, 126.2, 114.4, 104.6, 94.1, 83.9, 77.4, 44.8, 24.9, 12.5. HRMS (TOF-ESI): Calcd for C<sub>24</sub>H<sub>33</sub>BNO<sub>4</sub> [M+H<sup>+</sup>] 410.2503; Found, 410.2492.

**Compound P2.** Compound 5 (0.4 g, 1 mmol), malononitrile (0.066 g, 1 mmol), piperidine (0.85 g, 10 mmol) and absolute ethanol (15 mL) was stirred under Ar at 25 °C for 1.5 h. Then the mixture was filtered. The yellow solid was washed with ethanol and then purified by silica gel flash chromatography to get the title compound **P2** (0.32 g, 70%). <sup>1</sup>H NMR (400 MHz, DMSO-*d*<sub>6</sub>): δ 8.05 (d, *J* = 9.2 Hz, 1H), 7.97 (s, 1H), 7.71 (d, *J* = 7.6 Hz, 2H), 7.50 (d, *J* = 7.6 Hz, 2H), 6.55 (d, *J* = 9.2 Hz, 1H), 6.23 (d, *J* = 0.8 Hz, 1H), 5.32 (s, 2H), 3.47 (q, *J* = 6.8 Hz, 4H), 1.30 (s, 12H), 1.08 (t, *J* = 6.8 Hz, 6H). <sup>13</sup>C NMR (100 MHz, DMSO-*d*<sub>6</sub>): δ 161.0, 154.9, 150.7, 140.1, 135.2, 130.4, 127.5, 117.6, 116.6, 109.2, 106.8, 94.8, 84.2, 70.2, 66.3, 44.9, 25.1, 12.9. HRMS (TOF-ESI): Calcd for C<sub>27</sub>H<sub>32</sub>BN<sub>3</sub>O<sub>3</sub> [M+H<sup>+</sup>] 458.2615; Found, 458.2610.

**Compound T1<sup>3</sup>.** Compound 4 (0.193 g, 1 mmol), malononitrile (0.066 g, 1 mmol), piperidine (0.009 g, 0.1 mmol) and absolute ethanol (10 mL) was stirred at 25 °C for 15 min. Then the mixture was filtered. The yellow solid was recrystallized with absolute ethanol and then purified by silica gel flash chromatography to get the title compound **T1** (0.145 g, 60%). <sup>1</sup>H NMR (400 MHz, CDCl<sub>3</sub>): δ 7.55 (s, 1H), 7.13 (d, *J* = 8.8 Hz, 1H), 6.47 (dd, *J*<sub>1</sub> = 8.8 Hz, *J*<sub>2</sub> = 1.6 Hz, 1H), 6.31 (s, 1H), 3.43 (q, *J* = 7.2 Hz, 4H), 1.23 (t, *J* = 7.2 Hz, 6H). <sup>13</sup>C NMR (100 MHz, CDCl<sub>3</sub>): δ 156.6, 152.6, 145.2, 130.2, 116.2, 108.3, 106.4, 97.1, 45.0, 12.5. HRMS (TOF-ESI): Calcd for C<sub>14</sub>H<sub>16</sub>N<sub>3</sub>O [M+H<sup>+</sup>] 242.1293; Found, 242.1293.

### 3. Methods and data

### 3.1 The pH titration

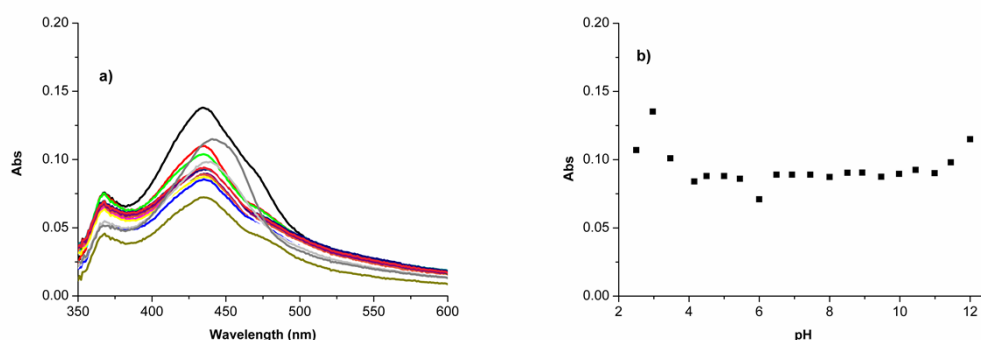

**Figure S1.** (a) Absorption responses of **P2** (20  $\mu\text{M}$ ) to various pH in water with 10%  $\text{CH}_3\text{CN}$  as the co-solvent. (b) The absorption (at 440 nm) versus different pH values in water with 10%  $\text{CH}_3\text{CN}$  as the co-solvent. pH 2-12.

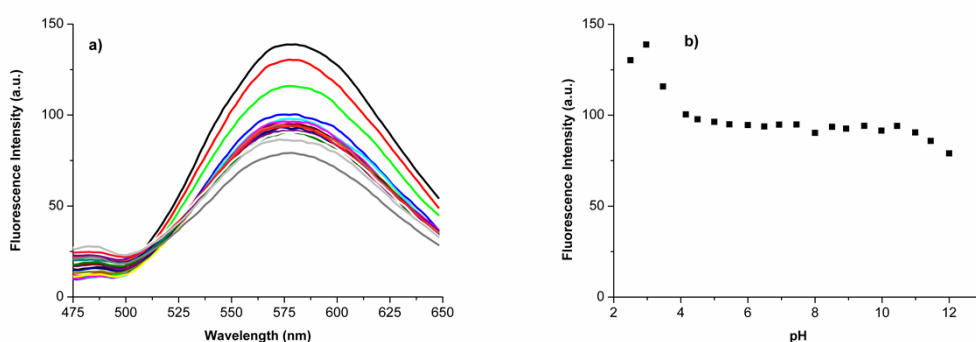

**Figure S2.** (a) Fluorescence responses of **P2** (20  $\mu\text{M}$ ) to various pH in water with 10%  $\text{CH}_3\text{CN}$  as the co-solvent. (b) The fluorescence (at 580 nm) versus different pH values in water with 10%  $\text{CH}_3\text{CN}$  as the co-solvent. pH 2-12, slit: 5 nm, 5 nm.

### 3.2 The detection limit

The detection limit was calculated according to the previous literature. The fluorescence intensity of **P2** was measured by ten times and the standard deviation was calculated. The fluorescence intensity at 480 nm was plotted as a concentration of  $\text{ONOO}^-$ . By using detection limit  $3\sigma/k$ , the detection limit was calculated as 0.35 nM.  $\sigma$  is the standard deviation of the fluorescence intensity of **P2**,  $k$  is the slope between the fluorescence intensity at 480 nm versus the  $\text{ONOO}^-$  concentration.

### 3.3 The kinetic curves of the probe P2 and ONOO<sup>-</sup>

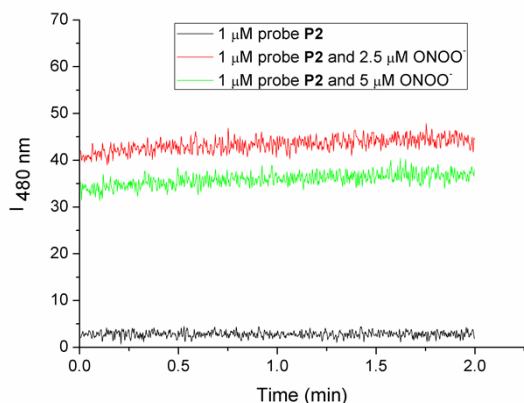

Figure S3. The kinetic curve of P2 (1 μM) and ONOO<sup>-</sup> (2.5 and 5 μM)

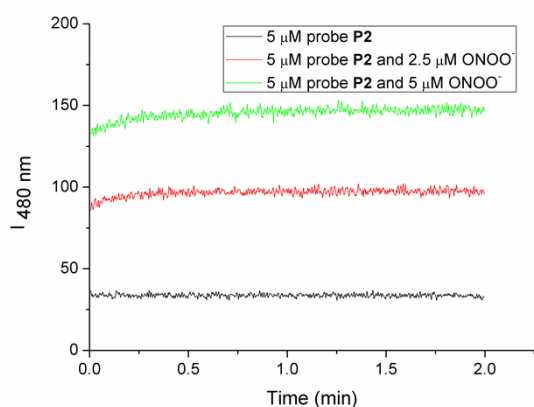

Figure S4. The kinetic curve of P2 (5 μM) and ONOO<sup>-</sup> (2.5 and 5 μM)

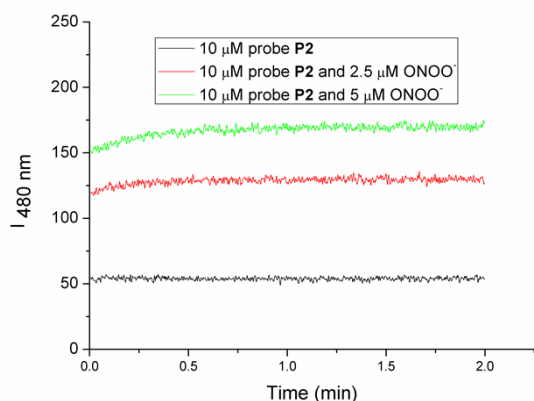

Figure S5. The kinetic curve of P2 (10 μM) and ONOO<sup>-</sup> (2.5 and 5 μM)

From the above figures, we found that even though the concentration of the probe was low, its reaction with ONOO<sup>-</sup> was very quick which could be finished mostly within 10 s. This was good for detection cause H<sub>2</sub>O<sub>2</sub> would react with the probe much slower than ONOO<sup>-</sup> which required at least half an hour.

### 3.4 The reaction between the probe and H<sub>2</sub>O<sub>2</sub>

We could observe that H<sub>2</sub>O<sub>2</sub> was also able to induce a similar fluorescence enhancement at 480 nm. However the reaction was very slow and it took about at least 140 min for the reaction to complete. In addition, the reaction was not sensitive which required more than 100  $\mu$ M H<sub>2</sub>O<sub>2</sub>.

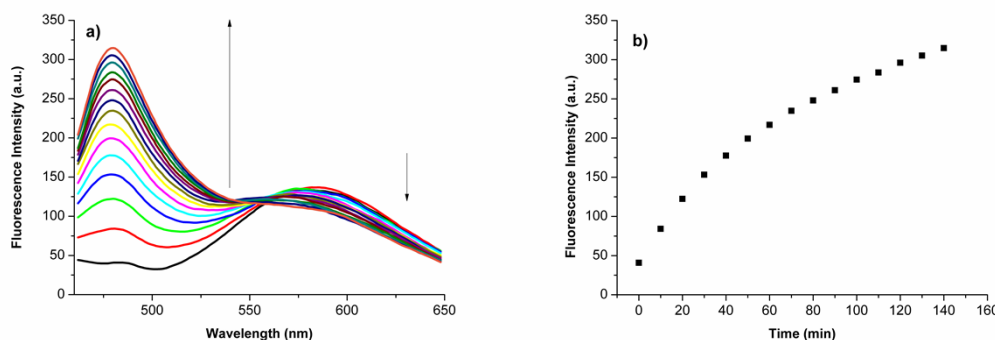

**Figure S6.** (a) The emission spectra of probe **P2** (20  $\mu$ M) upon addition of 100  $\mu$ M H<sub>2</sub>O<sub>2</sub> in PBS buffer (0.01M, pH 7.4) with 10% CH<sub>3</sub>CN as a co-solvent. The data were recorded every 10 min. (b) Fluorescence responses (I<sub>480 nm</sub>) of **P2** (20  $\mu$ M) to H<sub>2</sub>O<sub>2</sub> (100  $\mu$ M). Excitation wavelength was 440 nm. Slit: 5 nm, 5 nm.

### 3.5 HPLC condition

HPLC was performed on a ZoRBAX RX-C18 column (Analytical 4.6 $\times$ 250mm 5-Micron, Agilent) with a HP 1100 system. The HPLC solvents employed were acetonitrile and buffer (acetic acid and ammonium acetate pH 6.0). HPLC conditions were as follows: solvent A: solvent B = 30:70 (0 min)-100:0 (20 min), flow rate 1 mL/min, detection by UV (430 nm).

### 3.6 Cell Culture and Imaging

HeLa cells were obtained from American Type Culture collection, and grown in Dulbecco's modification of Eagle's medium Dulbecco (DMEM/high: with 4500 mg/L Glucose, 4.0 mM L-Glutamine, and 110 mg/L Sodium Pyruvate) supplemented with 10% foetal bovine serum (FBS). Cells were incubated in a 5% CO<sub>2</sub> humidified incubator at 37  $^{\circ}$ C and typically passaged with sub-cultivation ratio of 1:4 every two days.

For fluorescence microscopy, HeLa cells were seeded in 24-well culture plate for one night. The cells were first incubated with **P2** (15  $\mu$ M) for 30 min at 37  $^{\circ}$ C and washed with phosphate buffer (pH 7.4). Then the cells were treated with or without ONOO<sup>-</sup> (10  $\mu$ M) for another 2 min at 37  $^{\circ}$ C and washed with phosphate buffer (pH 7.4) for three times. Fluorescence imaging was performed with Nikon Ti-S with Xenon lamp. Exposure time is 1 s

for blue emission.

### 3.7 The toxicity of the probe **P2**

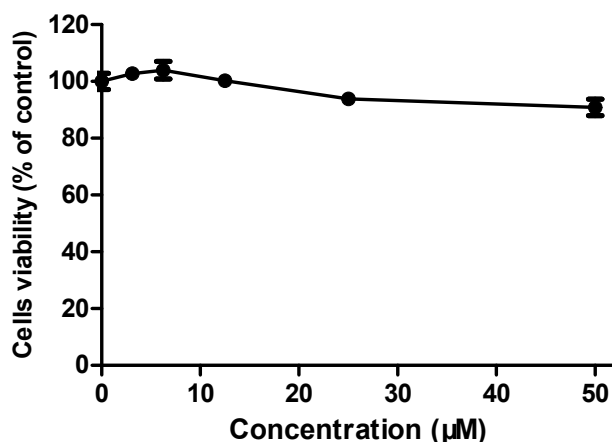

**Figure S7.** The toxicity of **P2**

The cytotoxicity was carried out by MTT method. HeLa cells were placed in 96-well culture plates ( $1 \times 10^4$  cells/well), and allowed to attach for 24 h before the next treatment. The cells were incubated in the absence and presence of **P2** at different concentrations for 24 h at 37 °C. Then 20 µL of MTT solution (5 mg/mL) was added and 100 µL of DMSO was replaced after 4 h. Absorbance at 570 nm was measured with EnSpire Multimode Plate Reader (Perkin Elmer, Boston, MA). Cell viability was showed as percentage of untreated control cells.

From the figure, we know that the probe had very little toxicity towards HeLa cells.

### 3.8 The second-order rate constants for the reaction of the probe with ONOO<sup>-</sup> and H<sub>2</sub>O<sub>2</sub>.

First, we detected the kinetic profiles of the reaction under pseudo-first-order conditions with a large excess of ONOO<sup>-</sup> and H<sub>2</sub>O<sub>2</sub> over probe **P2** (10 µM) in pH 7.4 PBS (containing 10% CH<sub>3</sub>CN as cosolvent) at room temperature.

The pseudo-first-order rate constant  $k'$  was calculated according to equation<sup>4</sup> (1):

$$\ln[(F_{\max} - F_t)/F_{\max}] = -k't \quad (1)$$

Where  $F_t$  and  $F_{\max}$  are the fluorescence intensities at 480 nm at time  $t$  and the maximum value obtained after the reaction is complete, respectively, and  $k'$  is the pseudo-first-order rate constant. In the process, we found that if there was too much ONOO<sup>-</sup>, then the fluorescence would first increase and later decrease, therefore we chose the fluorescence enhancement as the calculated scope of the equation.

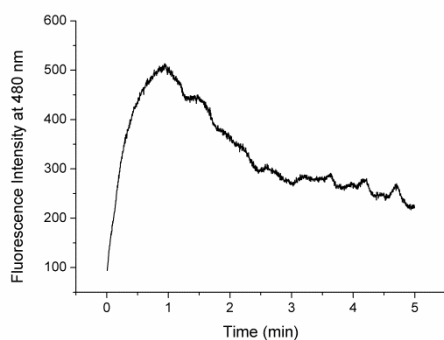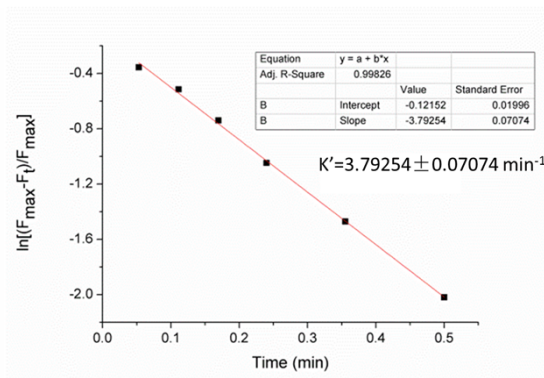

**Figure S8.** The kinetic curve of the reaction between the probe **P2** (10  $\mu\text{M}$ ) and  $\text{ONOO}^-$  (250  $\mu\text{M}$ ) and the pseudo-first-order rate constant  $k'$ ,  $k'$  was  $3.79254 \pm 0.07074 \text{ min}^{-1}$ .

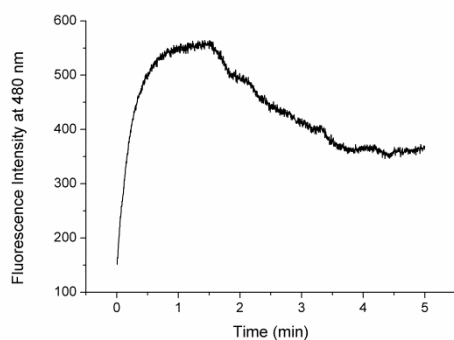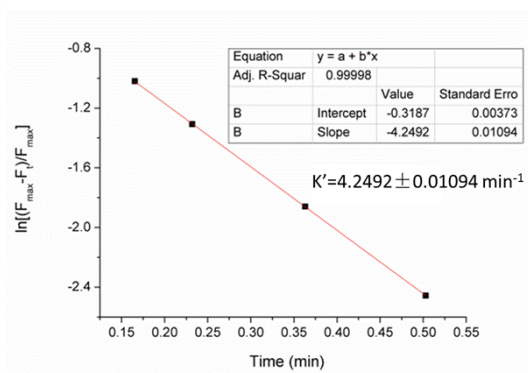

**Figure S9.** The kinetic curve of the reaction between the probe **P2** (10  $\mu\text{M}$ ) and  $\text{ONOO}^-$  (300  $\mu\text{M}$ ) and the pseudo-first-order rate constant  $k'$ ,  $k'$  was  $4.2492 \pm 0.01094 \text{ min}^{-1}$ .

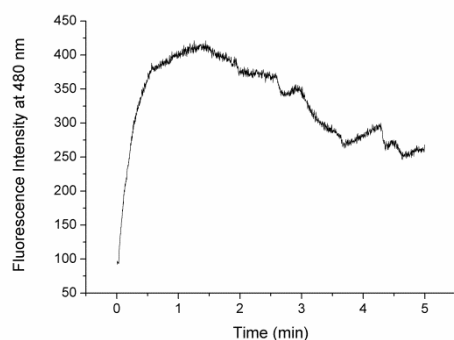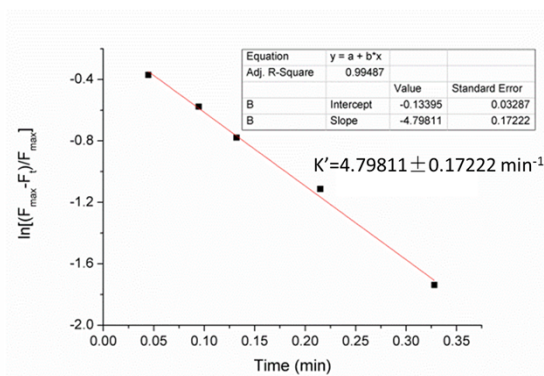

**Figure S10.** The kinetic curve of the reaction between the probe **P2** (10  $\mu\text{M}$ ) and  $\text{ONOO}^-$  (375  $\mu\text{M}$ ) and the pseudo-first-order rate constant  $k'$ ,  $k'$  was  $4.79811 \pm 0.17222 \text{ min}^{-1}$ .



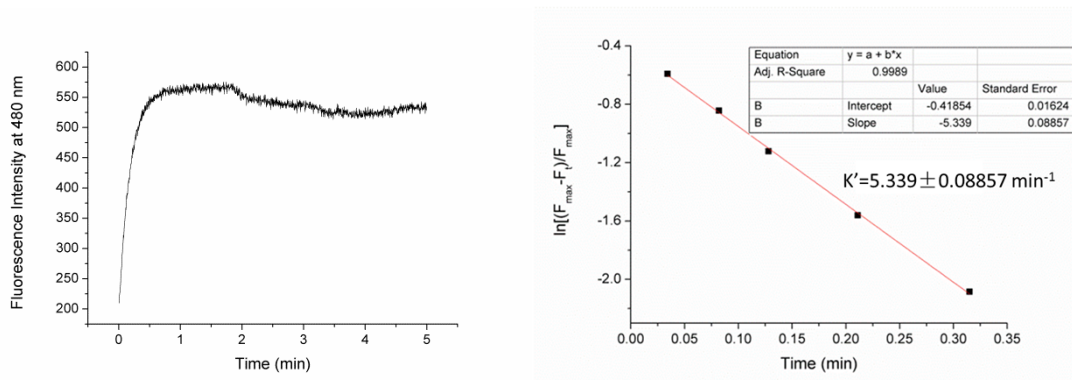

**Figure S11.** The kinetic curve of the reaction between the probe **P2** (10  $\mu\text{M}$ ) and  $\text{ONOO}^-$  (450  $\mu\text{M}$ ) and the pseudo-first-order rate constant  $k'$ ,  $k'$  was  $5.339 \pm 0.08857 \text{ min}^{-1}$ .

The second-order rate constant for this reaction is thus the slope of the linear plot of  $k'$  versus the concentration of  $\text{ONOO}^-$ :

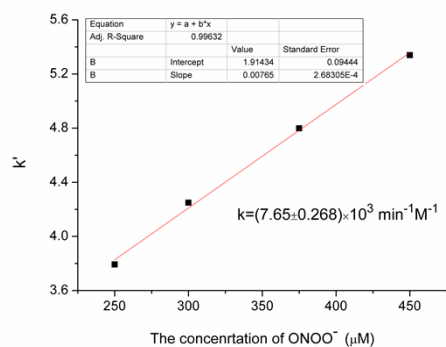

**Figure S12.** Plot of the apparent rate constant  $k'$  versus the concentrations of  $\text{ONOO}^-$ ,  $k$  was  $(7.65 \pm 0.268) \times 10^3 \text{ min}^{-1}\text{M}^{-1}$ .

Therefore the rate constant for the reaction between the probe and  $\text{ONOO}^-$  is  $(7.65 \pm 0.268) \times 10^3 \text{ min}^{-1}\text{M}^{-1}$ .

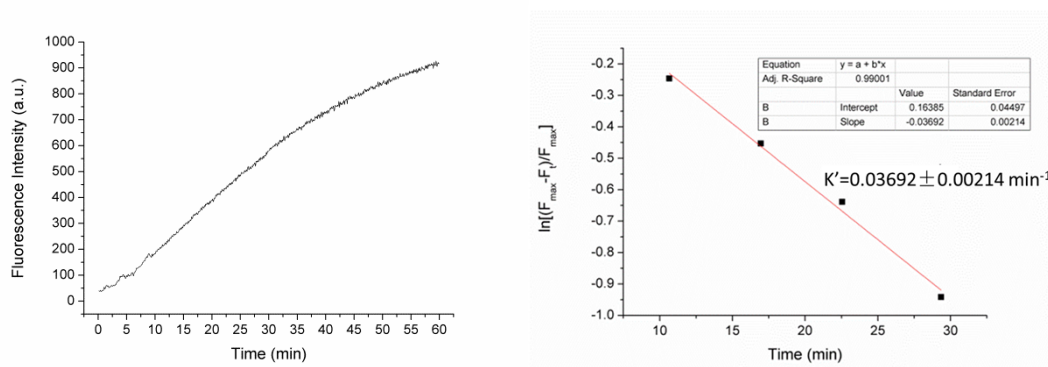

**Figure S13.** The kinetic curve of the reaction between the probe **P2** (10  $\mu\text{M}$ ) and  $\text{H}_2\text{O}_2$  (500  $\mu\text{M}$ ) and the pseudo-first-order rate constant  $k'$ ,  $k'$  was  $0.03692 \pm 0.00214 \text{ min}^{-1}$ .

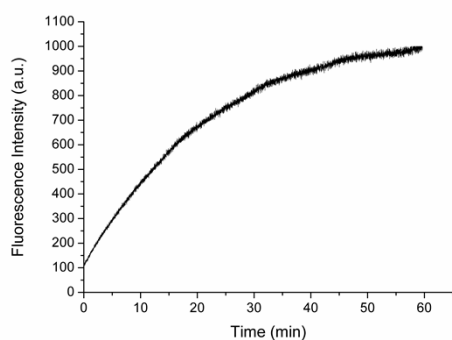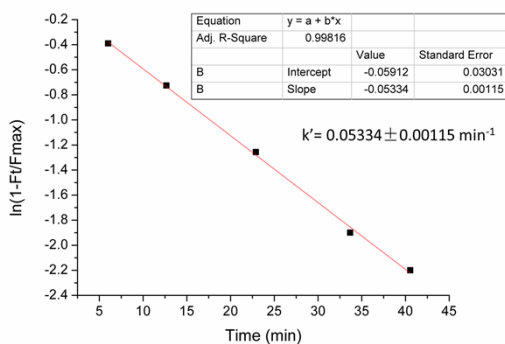

**Figure S14.** The kinetic curve of the reaction between the probe **P2** (10  $\mu\text{M}$ ) and  $\text{H}_2\text{O}_2$  (680  $\mu\text{M}$ ) and the pseudo-first-order rate constant  $k'$ ,  $k'$  was  $0.05334 \pm 0.00115 \text{ min}^{-1}$ .

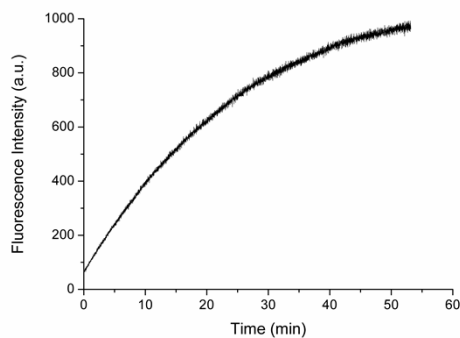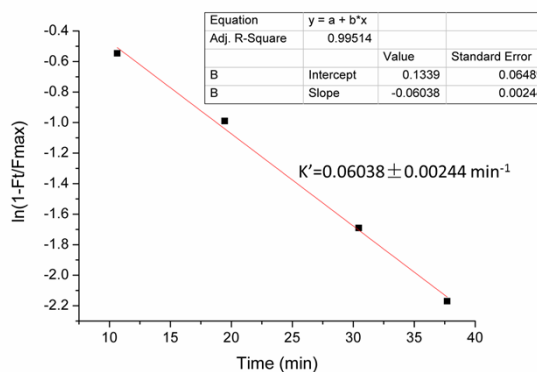

**Figure S15.** The kinetic curve of the reaction between the probe **P2** (10  $\mu\text{M}$ ) and  $\text{H}_2\text{O}_2$  (750  $\mu\text{M}$ ) and the pseudo-first-order rate constant  $k'$ ,  $k'$  was  $0.06038 \pm 0.00244 \text{ min}^{-1}$ .

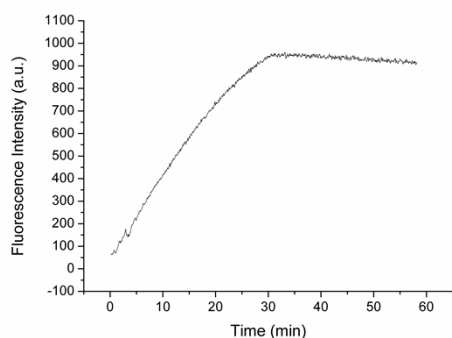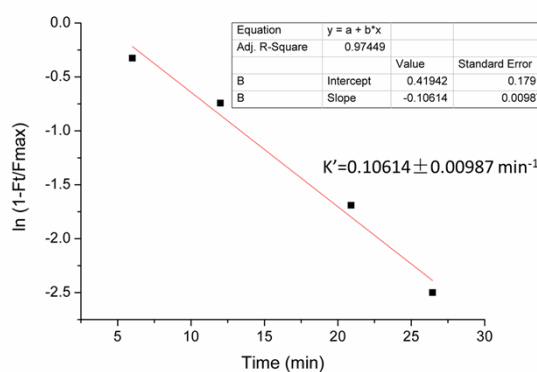

**Figure S16.** The kinetic curve of the reaction between the probe **P2** (10  $\mu\text{M}$ ) and  $\text{H}_2\text{O}_2$  (1400  $\mu\text{M}$ ) and the pseudo-first-order rate constant  $k'$ ,  $k'$  was  $0.10614 \pm 0.00987 \text{ min}^{-1}$ .

The second-order rate constant for this reaction is thus the slope of the linear plot of  $k'$  versus the concentration of  $\text{H}_2\text{O}_2$ .

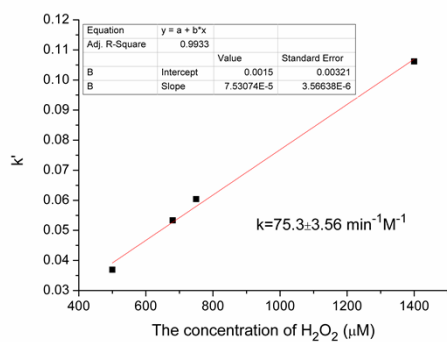

**Figure S17.** Plot of the apparent rate constant  $k'$  versus the concentrations of  $\text{H}_2\text{O}_2$ ,  $k$  was  $75.3 \pm 3.56 \text{ min}^{-1}\text{M}^{-1}$ .

Therefore the rate constant for the reaction between the probe and  $\text{H}_2\text{O}_2$  is  $75.3 \pm 3.56 \text{ min}^{-1}\text{M}^{-1}$ .

#### 4. NMR spectra

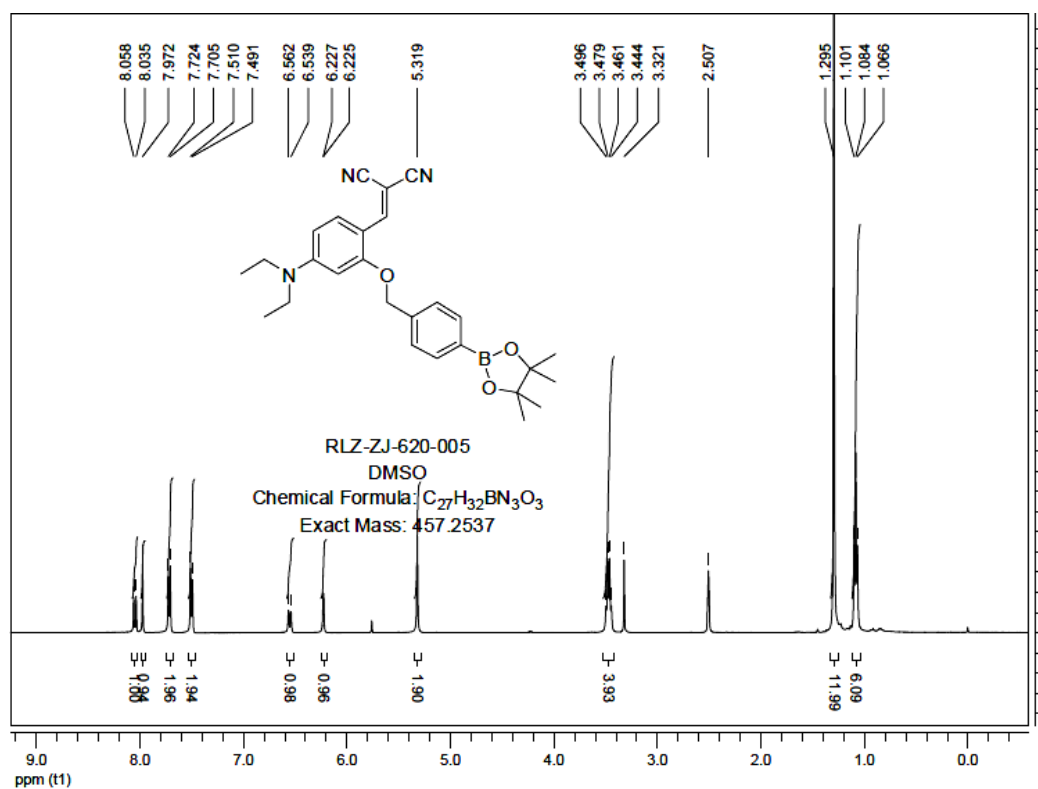

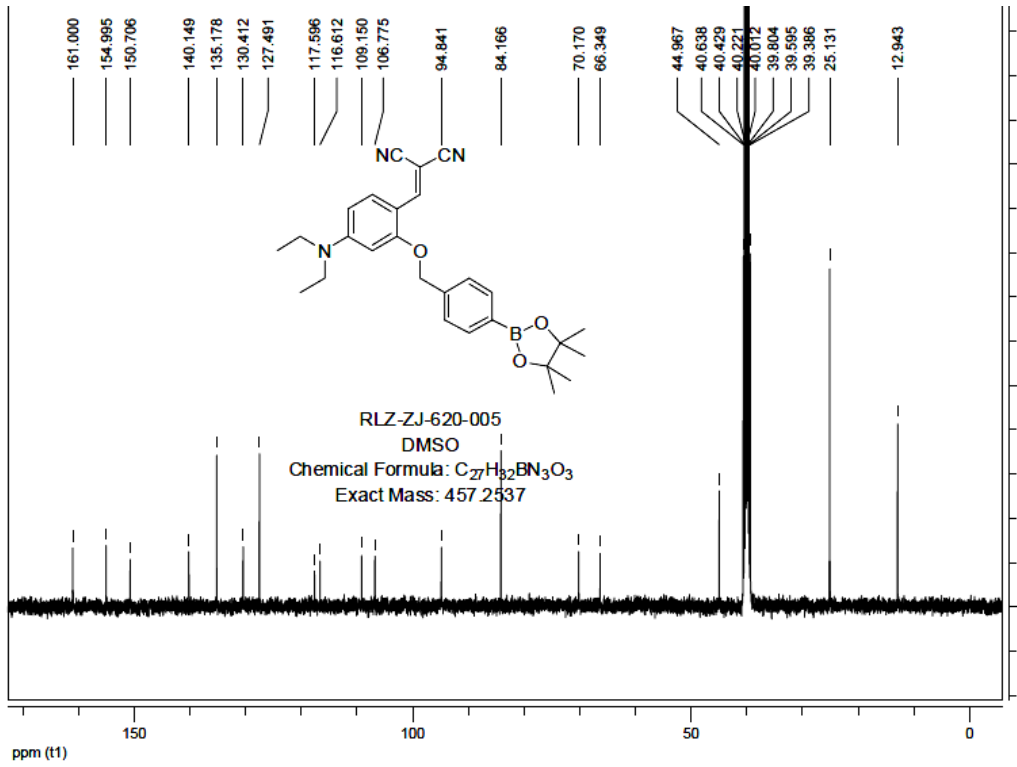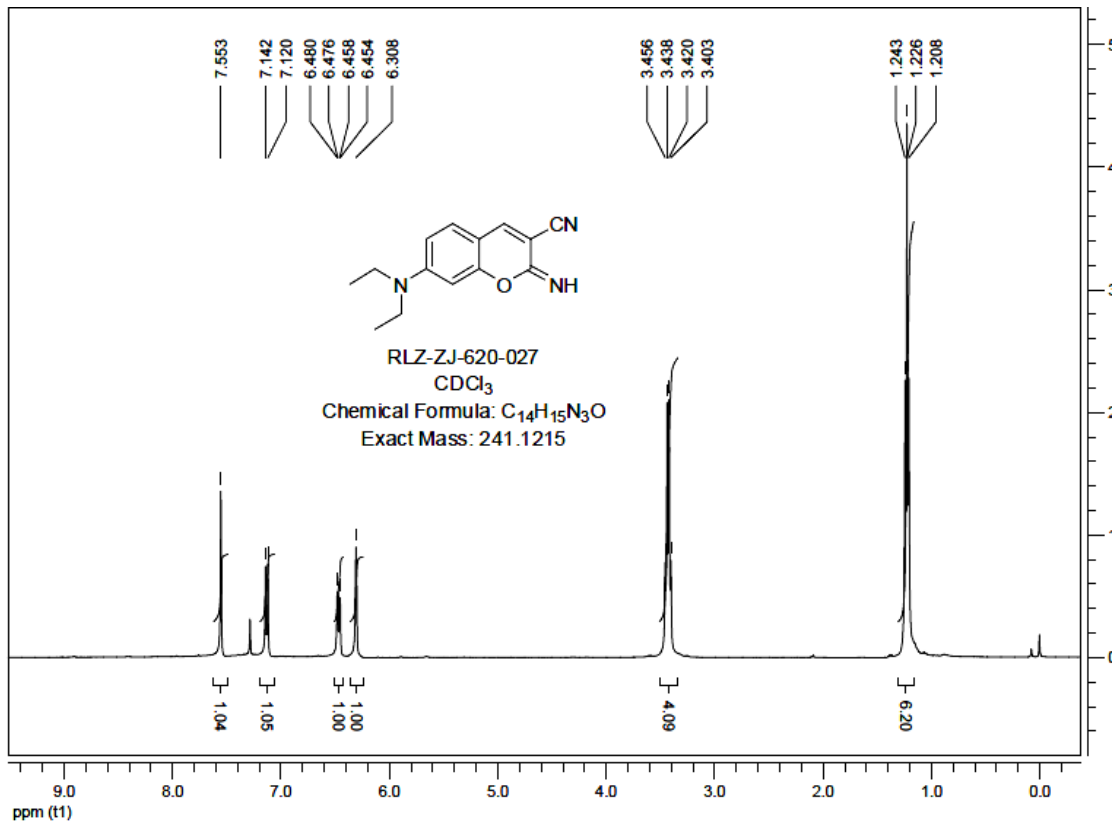

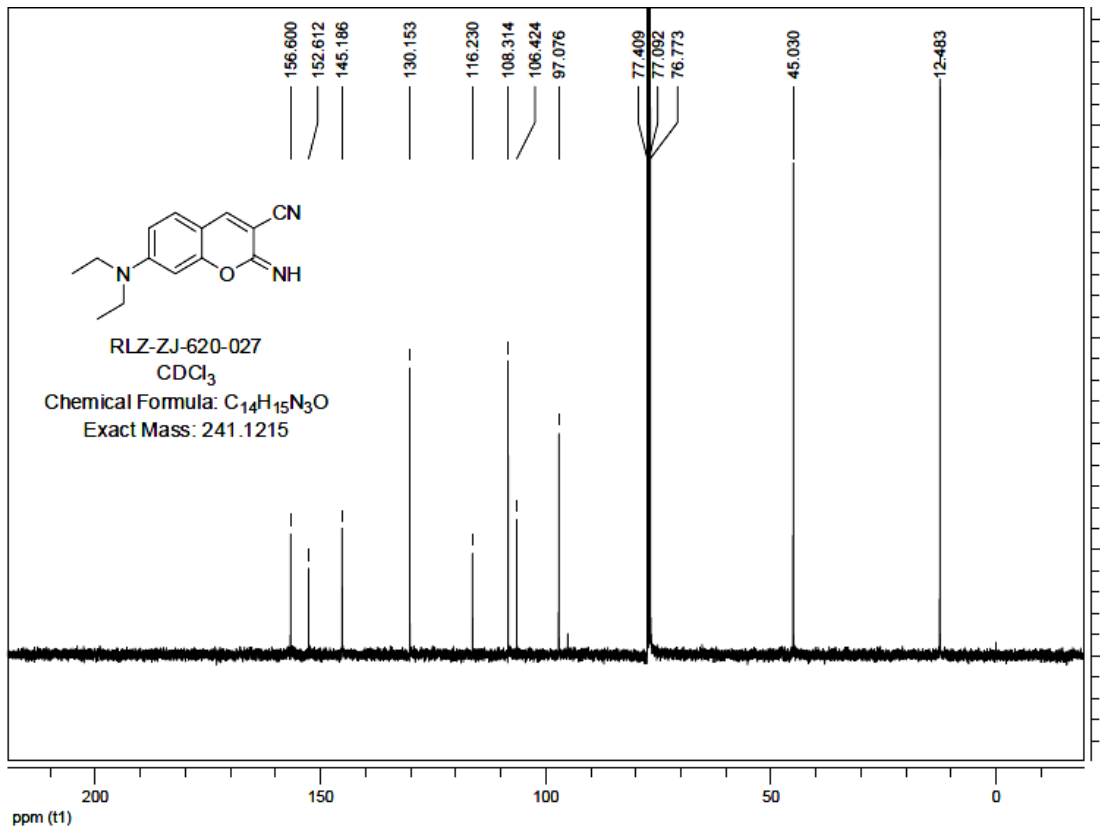

## 5. HRMS data

### Elemental Composition Report

#### Single Mass Analysis

Tolerance = 30.0 mDa / DBE: min = -1.5, max = 100.0  
 Element prediction: Off  
 Number of isotope peaks used for i-FIT = 2

Monoisotopic Mass, Odd and Even Electron Ions  
 15 formula(e) evaluated with 1 results within limits (up to 1 closest results for each mass)

Elements Used:  
 C: 0-24 H: 0-40 B: 0-1 N: 0-1 O: 0-4  
 WP-ZHU

ECUST institute of Fine Chem

ZWP-ZJ-005 16 (0.569) Cm (16:17)

Page 1

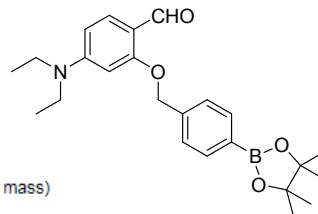

15-Nov-2013  
 10:28:53  
 1: TOF MS ES+  
 2.73e+003

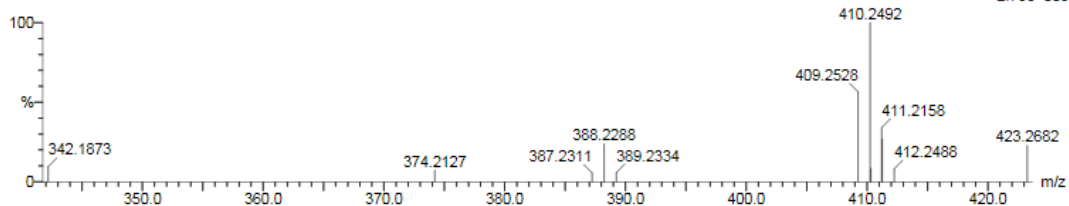

Minimum: -1.5  
 Maximum: 30.0 50.0 100.0

| Mass     | Calc. Mass | mDa  | PPM  | DBE | i-FIT | i-FIT (Norm) | Formula                                                |
|----------|------------|------|------|-----|-------|--------------|--------------------------------------------------------|
| 410.2492 | 410.2503   | -1.1 | -2.7 | 9.5 | 45.4  | 0.0          | $\text{C}_{24}\text{H}_{33}\text{B}\text{N}\text{O}_4$ |

## Elemental Composition Report

Page 1

### Single Mass Analysis

Tolerance = 30.0 mDa / DBE: min = -1.5, max = 100.0

Element prediction: Off

Number of isotope peaks used for i-FIT = 2

Monoisotopic Mass, Even Electron Ions

24 formula(e) evaluated with 1 results within limits (up to 1 closest results for each mass)

Elements Used:

C: 0-27 H: 0-40 11B: 0-1 N: 0-3 O: 0-3

WP-ZHU

ECUST institute of Fine Chem

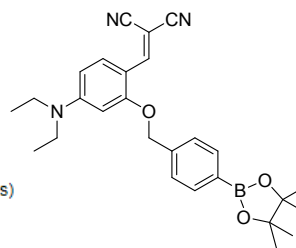

15-Nov-2013  
10:40:22  
1: TOF MS ES+  
7.53e+002

ZWP-ZJ-006 28 (0.937) Cm (28:29)

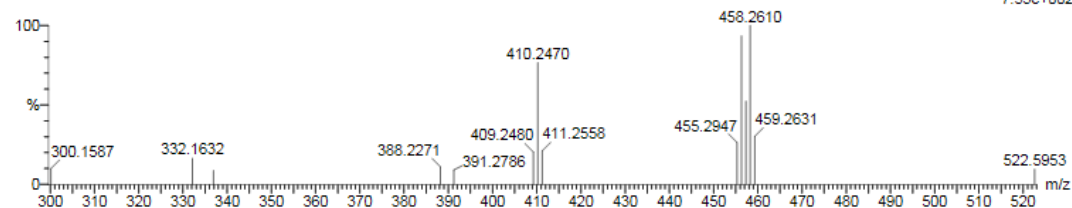

Minimum: -1.5  
Maximum: 100.0

| Mass     | Calc. Mass | mDa  | PPM  | DBE  | i-FIT | i-FIT (Norm) | Formula           |
|----------|------------|------|------|------|-------|--------------|-------------------|
| 458.2610 | 458.2615   | -0.5 | -1.1 | 13.5 | 6.9   | 0.0          | C27 H33 11B N3 O3 |

## Elemental Composition Report

Page 1

### Single Mass Analysis

Tolerance = 30.0 mDa / DBE: min = -1.5, max = 100.0

Element prediction: Off

Number of isotope peaks used for i-FIT = 2

Monoisotopic Mass, Even Electron Ions

47 formula(e) evaluated with 4 results within limits (up to 1 closest results for each mass)

Elements Used:

C: 0-47 H: 0-80 N: 0-6 O: 0-1

WP-ZHU

ECUST institute of Fine Chem

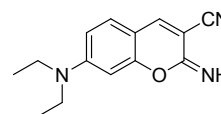

10-Jan-2014  
16:52:24  
1: TOF MS ES+  
1.57e+004

ZWP-ZJ-620-027 125 (0.862) Cm (120:127)

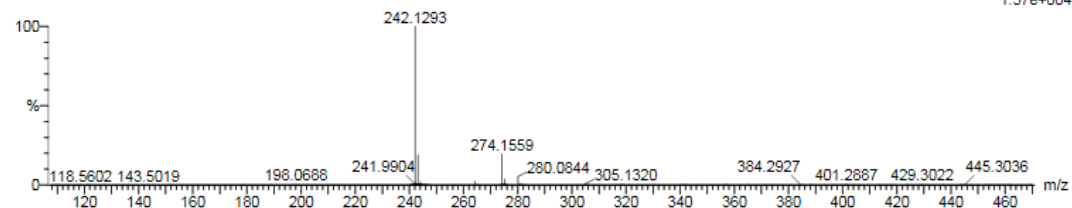

Minimum: -1.5  
Maximum: 100.0

| Mass     | Calc. Mass | mDa | PPM | DBE | i-FIT | i-FIT (Norm) | Formula      |
|----------|------------|-----|-----|-----|-------|--------------|--------------|
| 242.1293 | 242.1293   | 0.0 | 0.0 | 8.5 | 230.7 | 0.0          | C14 H16 N3 O |

## 6. References

1. B. C. Das, X.-Y. Tang and T. Evans, *Tetrahedron Lett.*, 2012, **53**, 1316.

2. J. Spencer, C. B. Baltus, H. Patel, N. J. Press, S. K. Callear, L. Male and S. J. Coles, *ACS Combinatorial Science*, 2010, **13**, 24.

3. H. Turki, S. Abid, Y. Le Bigot, S. Fery - Forgues and R. El Gharbi, *Synthetic*

*Communications*, 2004, **34**, 3553.

4.L. Yuan, W. Lin and Y. Yang, *Chem. Commun.*, 2011, **47**, 6275.
